# Supplementary material for: Functional Analysis of the ComK Protein of Bacillus coagulans
Source: PubMed Central journal article supplement (PMC3536758; doi:10.1371/journal.pone.0053471), 2013-01-03
Supplement: pone.0053471.s001.pdf [file pone.0053471.s001.pdf]

A

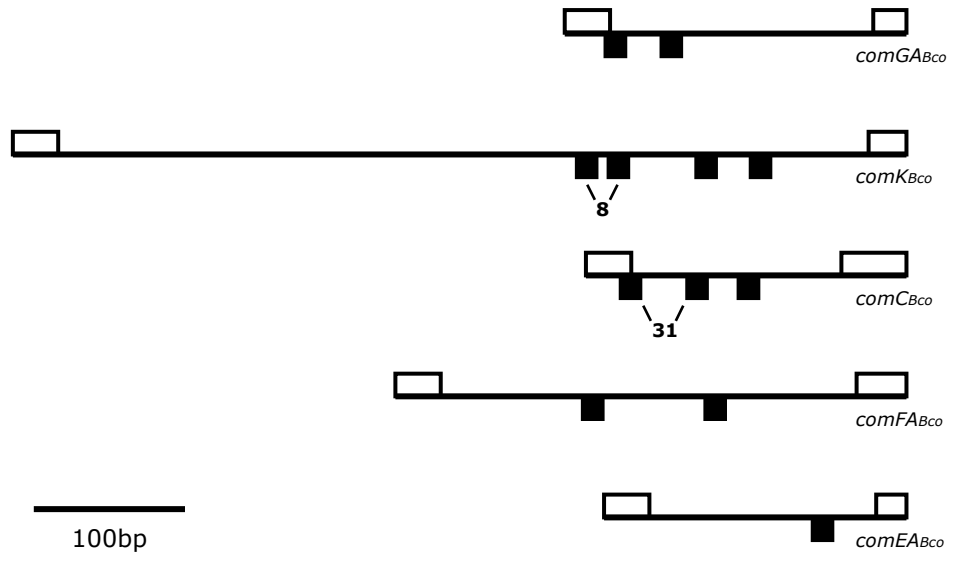

## B

### P<sub>comGA</sub><sub>Bco</sub>

```
1 aacaacgcca aaatttgtga caaaaatcac acactttttt gcggctgaga gaaaaaata gcgaaaaat tttgctttc agcaggaatt ttgaaagccg
>>.....Orf.....>>
101 tgtcgaaatg agagaatc ccaaaagaaa ggtggtatgt gatggattat gtcggtagaa aaaatcgcg
>>.....comGA.....>>
```

### P<sub>comK</sub><sub>Bco</sub>

```
1 ctggagcggg tccgatgct ggaagaataa ggaatactga aagtgcagca ggcgcggcct gttccgggca aaaatctttt ggccgtgccc tgcacctgcc
>>.....yhFN.....>>
101 atttttatgc aaaagaaaag ccatgcaaac gggccgggccc tgtttgcatg gctgtattt atccaaattg caggttgatt tttttaagtt cgttcgtaa
201 atgcatgaac tgcctcctcat cgcggagatc aagtacatgg tcaatttttc ttaataacte ttctcttttt ttgttcagca ggatctcatt cagcaacatg
301 tccgtgtaaa tgtgttccac aaatttctcc atctgaatcc gggacttcgg gctttctttc ggcacgtcag agaagattt tttgttttcc atgatgatac
401 acctttttcg ctttttttta ttatacagag catttcaata aaaagcaatg taaaattga atttttctga aacgattaac aaagaaaaa atgatatatt
501 ttaaaaaagt actagaaatg taggaagatt gtactataat agagagtgga tcatgagaaa aataaaatgg ggaatgcat tatgcaacat g
>>.....comK.....>>
```

### P<sub>comC</sub><sub>Bco</sub>

```
1 agtgaccggg tgcgaataaa ggggcaataa gttttcggca tgttcatcct tgccattaca tatgettaaat atcgccggtt gcttgccggt agcgaaccaa
>>.....Orf.....>>
101 gaaaatacca tatgctgaaa gatcagaggg atcaaacatg catggattat ggacagctta tttgcggca ctggggatgg
>>.....comC.....>>
```

### P<sub>comFA</sub><sub>Bco</sub>

```
1 tgctggatg ctgaaataag agccaggctg ttccaaatcg ctggaacagc ccggcaagat gggatcgtcc gggataaac tggcataaca ggcccgggga
>>.....Orf.....>>
101 caagccttga aacctgcggg acagccaata ccttttgagg attttagcga ttaagcgtat ccttccggg acaagaactt aacctgcgg gccaatccg
201 gattgaaataa gcagttgtaa tccatgcac cgtacaggt ttttccgaa tccgtttgga accgggccc cccatttgc tacctcccc gcaattgaca
301 aaggagtgat cactttgct tctgtttct cogaacag
>>.....comFA.....>>
```

### P<sub>comEA</sub><sub>Bco</sub>

```
1 atttccggt cegatcacg caatgtccat gctgttttcc ctccccaa gcgcgatcct tcagcggccg gtacaatata tgcgcagatc cgggcgatta
<<.....comER.....<<
101 tgtatctgaa aaaagaaaa cagaggtgaa ggtctttgaa aacgttgtt ctcaaatacc gctggcatgc tgetgcagct gttggcagca ttacgattgc
>>.....comEA.....>>
```
